# Supplementary material
Source: PubMed Central journal article supplement (PMC7571626)
Supplement: ehp6920.smcontents.508.pdf [file ehp6920.smcontents.508.pdf]

**Note to readers with disabilities:** *EHP* strives to ensure that all journal content is accessible to all readers. However, some figures and Supplemental Material published in *EHP* articles may not conform to [508 standards](#) due to the complexity of the information being presented. If you need assistance accessing journal content, please contact [ehp508@niehs.nih.gov](mailto:ehp508@niehs.nih.gov). Our staff will work with you to assess and meet your accessibility needs within 3 working days.

### **Supplemental Material**

#### **Association between Kawasaki Disease and Prenatal Exposure to Ambient and Industrial Air Pollution: A Population-Based Cohort Study**

Stephane Buteau, Sabrina Belkaibech, Marianne Bilodeau-Bertrand, Marianne Hatzopoulou, Audrey Smargiassi, and Nathalie Auger

#### **Table of Contents**

**Table S1.** Model fit of the adjusted response function for prenatal exposure to air pollutants using linear and nonlinear structures in the analysis of the association with Kawasaki disease.

**Table S2.** Distribution of incident Kawasaki diagnosis by administrative health region in Quebec.

**Table S3.** Pearson correlation coefficient of prenatal exposure to ambient and industrial air pollutants.

**Table S4.** Adjusted hazard ratio per interquartile range increment between Kawasaki disease and average prenatal exposure to ambient PM<sub>2.5</sub>, NO<sub>2</sub> and SO<sub>2</sub> from industrial emissions and ambient PM<sub>2.5</sub> and NO<sub>2</sub>, by selected characteristics.

**Table S5.** Adjusted hazard ratio per interquartile range increment from single pollutant models for the association between Kawasaki disease and average prenatal exposure to industrial PM<sub>2.5</sub>, NO<sub>2</sub> and SO<sub>2</sub> and ambient PM<sub>2.5</sub> and NO<sub>2</sub> in Quebec, Canada.

**Figure S1. Adjusted hazard ratio (HR) between prenatal exposure to ambient air pollution and incidence of Kawasaki disease, according to selected characteristics.** Dots represent the mean HR for interquartile (IQR) increments in air pollution exposure, and bars represent 95% confidence intervals, estimated separately for each subgroup using single pollutant Cox models, adjusted for maternal age, parity, sex, multiple birth, material deprivation, maternal smoking during pregnancy, birth year and rural/urban residence. The horizontal axis indicates binary categories (no/yes) for patient characteristics. “Warm season” represents spring or summer. IQRs are 3.8 µg/m<sup>3</sup> for ambient PM<sub>2.5</sub>, 11.9 µg/m<sup>3</sup> for ambient NO<sub>2</sub>, 0.13 µg/m<sup>3</sup> for industrial PM<sub>2.5</sub>, 1.1 µg/m<sup>3</sup> for industrial NO<sub>2</sub>, and 1.7 µg/m<sup>3</sup> for industrial SO<sub>2</sub>. Numeric values for HRs and 95% CIs, as well as the number of cases in each subgroup and p-value of Cochran Q tests, are provided in Table S4.
